# Supplementary material for: Recurrence Based Similarity Identification of Climate Data
Source: Hindawi journal article supplement (doi:10.1155/2017/7836720), 2017-01-01
Supplement: f1 [file 7836720.f1.pdf]

## Appendix 1

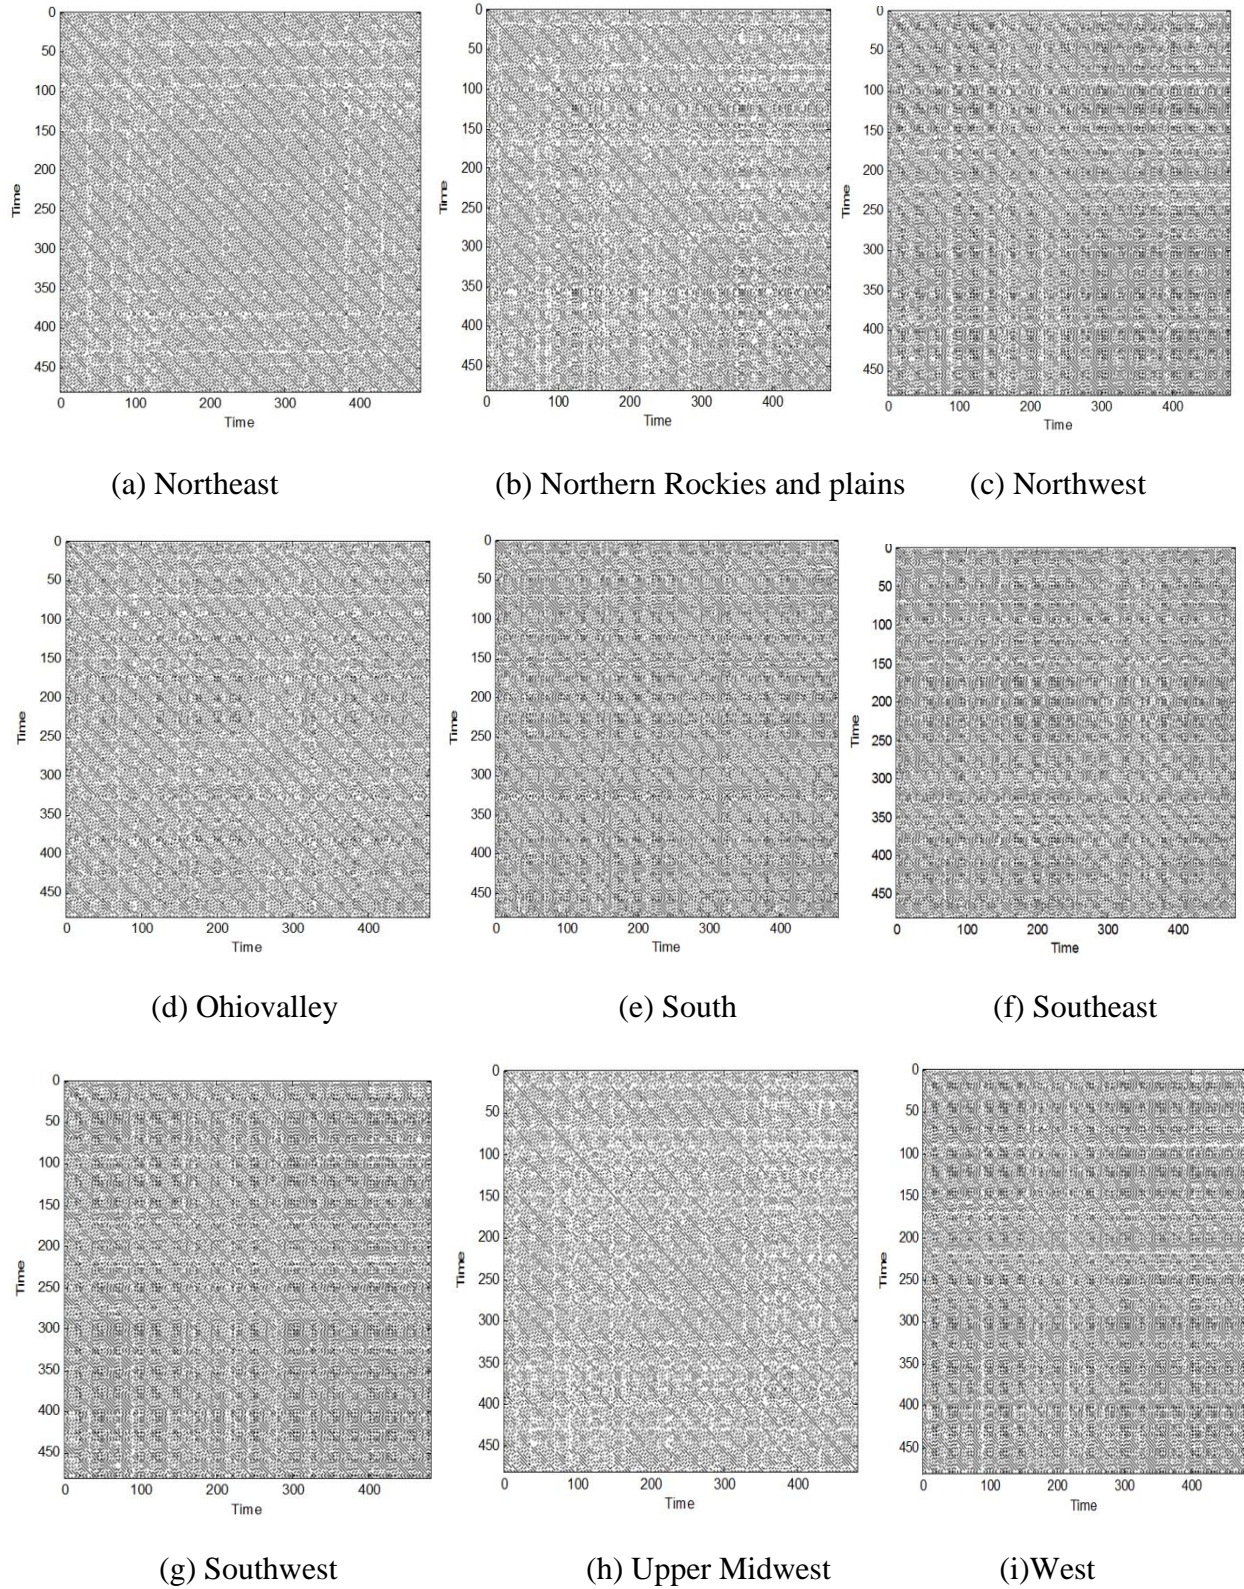

**Figure 17.** Recurrence plots for US regions season wise (120 years \* 4 seasons)

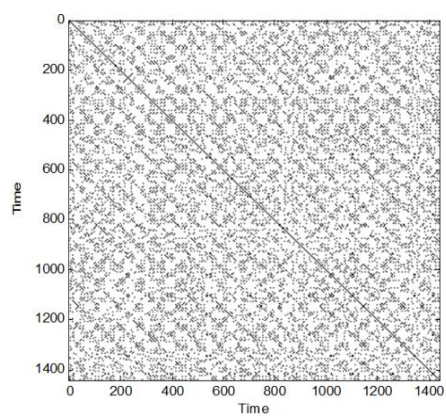

(a) Northeast

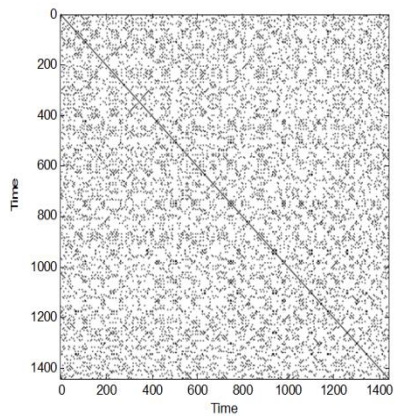

(b) Northern Rockies and plain

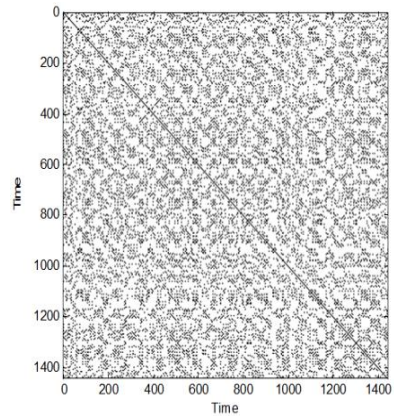

(c) Northwest

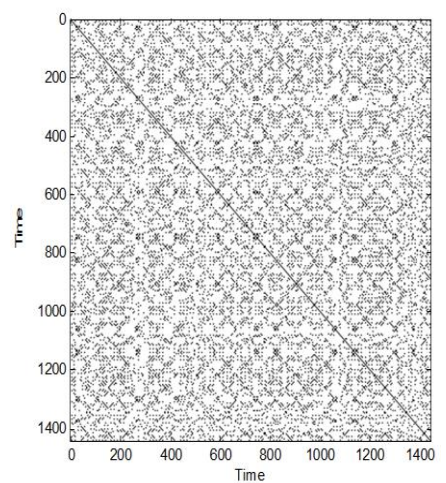

(d) Ohiovalley

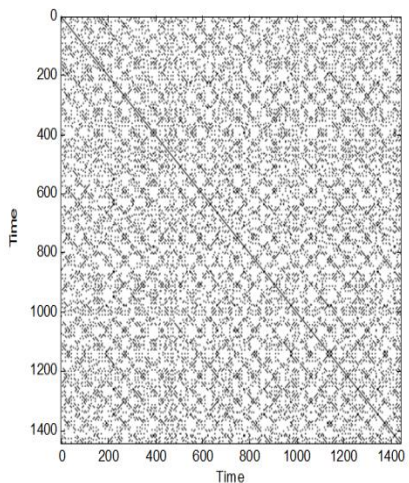

(E) South

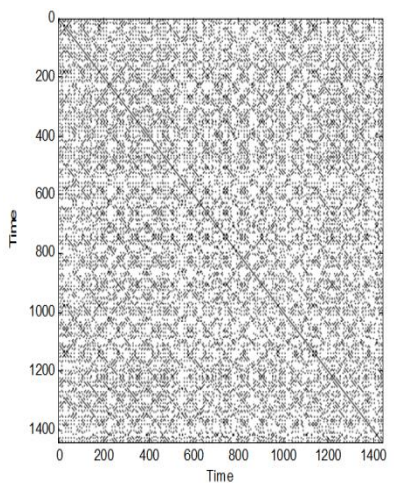

(F) Southeast

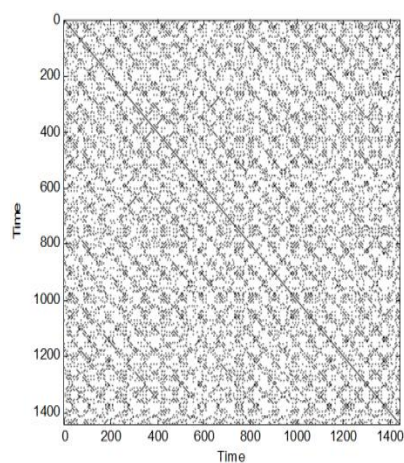

(g) Southwest

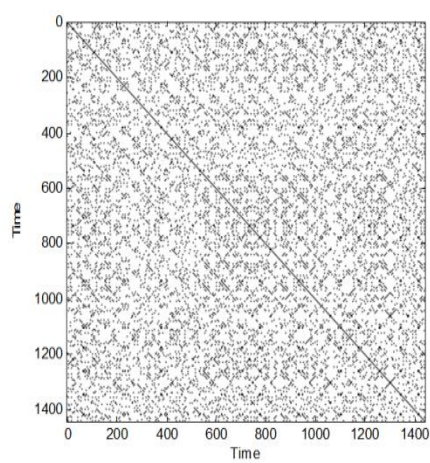

(h) Upper Midwest

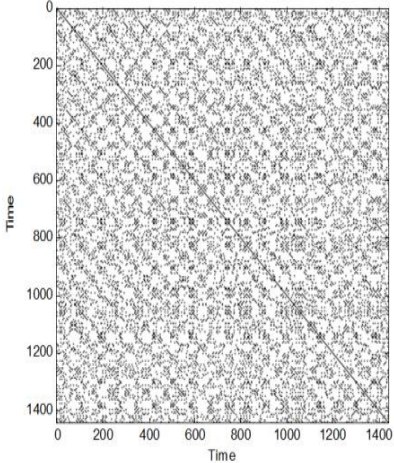

(i) West

**Figure 18.** Recurrence Plots for US regions month-wise (1440 months)

**Table 9.** CPR binning table for season wise US and China regions

|                                      | <b>Strong</b> | <b>Moderate</b> | <b>Weak</b> |
|--------------------------------------|---------------|-----------------|-------------|
| <b>U.S. Climate data (36 pairs)</b>  |               |                 |             |
| <b>Season</b>                        |               |                 |             |
| Spring                               | 2             | 1               | 33          |
| Summer                               | 8             | 1               | 27          |
| Autumn                               | 1             | 3               | 32          |
| Winter                               | 4             | 4               | 28          |
| <b>China Climate data (28 pairs)</b> |               |                 |             |
| <b>Season</b>                        |               |                 |             |
| Spring                               | 2             | 2               | 24          |
| Summer                               | 7             | 3               | 18          |
| Autumn                               | 4             | 3               | 21          |
| Winter                               | 3             | 5               | 20          |
